# Supplementary material for: Ultrafast vibrational wave packet dynamics of the aqueous tyrosyl radical anion induced by photodetachment
Source: Royal Society of Chemistry journal article supplement (doi:10.1039/d1cp02975d), 2021-01-01
Supplement: d1cp02975d1.pdf [file d1cp02975d1.pdf]

## Supplementary Information

# Ultrafast Vibrational Wave Packet Dynamics of the Aqueous Tyrosyl Radical Anion Induced by Photodetachment

Muhammad Shafiq Bin Mohd Yusof,<sup>1</sup> Yong Liang Lim,<sup>1</sup> Zhi-Heng Loh<sup>\*1</sup>

<sup>1</sup>Division of Chemistry and Biological Chemistry, School of Physical and Mathematical Sciences, Nanyang Technological University, 21 Nanyang Link, Singapore 637371, Singapore

---

\* Corresponding author. E-mail: [zhiheng@ntu.edu.sg](mailto:zhiheng@ntu.edu.sg)

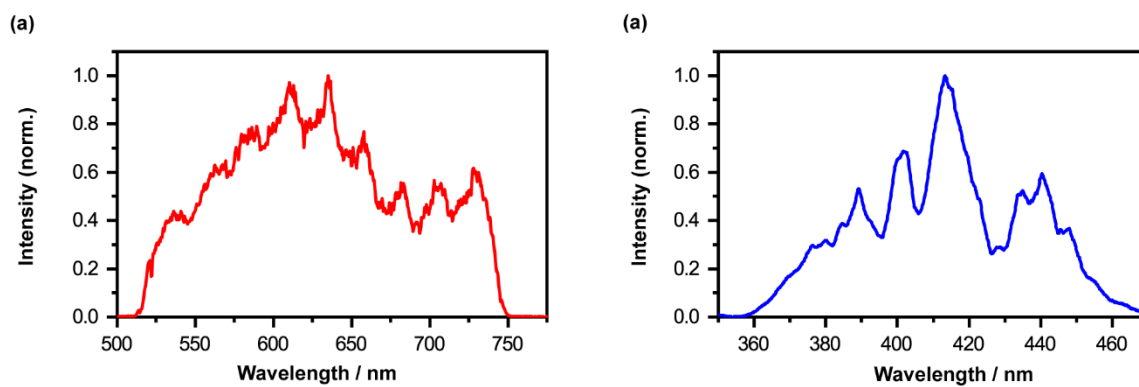

**Fig. S1 (a)** The visible-NIR ionizing pump spectrum ranges from 520 nm to 750 nm, with a central wavelength of 630 nm. **(b)** The UV probe spectrum ranges from 360 nm to 470 nm.

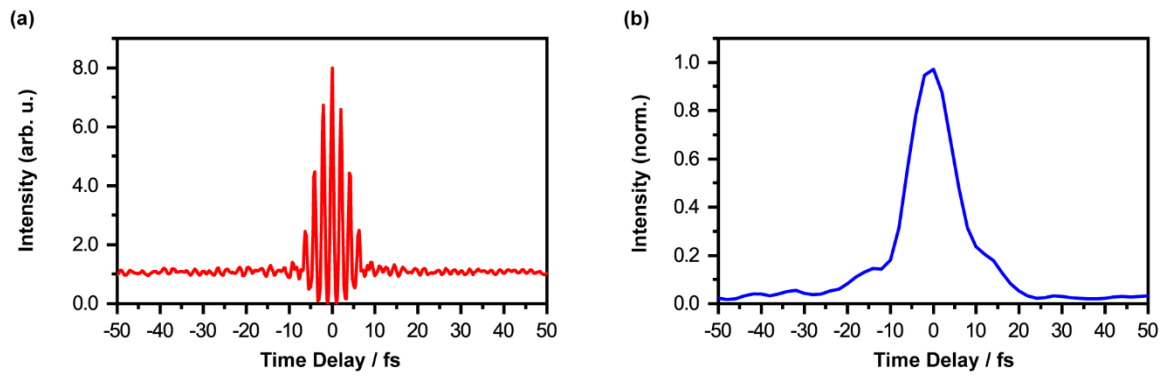

**Fig. S2 (a)** A second-order interferometric auto-correlation trace of the visible-NIR ionizing pump spectrum, measured in a 10- $\mu\text{m}$ -thick,  $\theta = 37.0$  deg Type I BBO crystal, reveals a pulse duration with full-width-half-maximum (FWHM) of 5.2 fs. **(b)** The pump-probe cross-correlation, measured *via* difference frequency mixing in a 10- $\mu\text{m}$ -thick,  $\theta = 29.2$  deg Type I BBO crystal, reveals a FWHM of 12 fs.

## Section S1. Photon-Order Measurements for Strong-Field Photodetachment of the Tyrosinate Dianion in Aqueous Solution

A power dependence measurement is performed to determine the photon order of the strong-field photodetachment process of the tyrosinate dianion in aqueous solution. For an  $N$ -photon photodetachment process, the differential absorption signal,  $\Delta A$ , scales with intensity,  $I$ , i.e.  $\Delta A \propto I^N$ . The photon-order measurements are performed by using a visible-NIR probe, which measures the absorption of the ground-state hydrated electron at a pump-probe time delay of 5 ps. The photon-order measurements are performed in the visible region due to the strong absorption of the ground-state hydrated electron at 720 nm. Since the hydrated electron is produced alongside upon the photodetachment of tyrosinate dianion and hydroxide ion, the hydrated electron absorption signal is proportional to the extent of the photodetachment process.

Several factors are taken into consideration in order to determine the photon order accurately of the photodetachment. During the photodetachment of aqueous solution of the tyrosinate dianion, there is a possibility that electrons are produced from both the tyrosinate dianion and hydroxide ion, even though the ionization of the solute is more likely to occur due to its vertical ionization potential ( $\sim 7.1$  eV)<sup>1,2</sup> being significantly lower than that of the hydroxide ion (9.2 eV).<sup>3</sup> In our study, the  $\Delta A$  against ionizing pump intensity is recorded for both the aqueous tyrosinate dianion and aqueous sodium hydroxide under similar experimental conditions. A difference  $\Delta A$  signal ( $\Delta\Delta A$ ) is then obtained, which in principle corresponds to solely the  $\Delta A$  signal from the photodetachment of tyrosinate dianion, shown in Fig. 3 of the main text. The  $\Delta\Delta A$  signal is then fit to the following function:

$$\Delta\Delta A = \alpha I^N / [1 + (I/I_{\text{sat}})^N], \quad (1)$$

where  $\alpha$  is the amplitude,  $N$  is the photon order and  $I_{\text{sat}}$  is the saturation intensity. The best fit when  $N = 3$  yields  $\alpha = (6.90 \pm 0.06) \times 10^{-42} \text{ cm}^6 \cdot \text{W}^{-3}$  and  $I_{\text{sat}} = (1.67 \pm 0.01) \times 10^{13} \text{ W} \cdot \text{cm}^{-2}$ . The value of  $N$  indicates that the photodetachment of tyrosinate dianion in aqueous environment occurs via a three-photon process.

## Section S2. Calculation of the Initial Concentration of the Hydrated Electron

The  $\Delta A_1(\lambda)$  values obtain from the global fitting of the time traces track the formation of the hydrated electron, and thus should follow the absorption spectrum of the hydrated electron. By plotting a graph of  $\Delta A_1$  as a function of the molar extinction coefficient of the hydrated electron,  $\epsilon_e$ , (Fig. S3) we would obtain the initial concentration of hydrated electron,  $c_e$ . Using the relation in Eq. 2 of the main text, the gradient obtained from the linear fit is  $c_e L = (3.08 \pm 0.02) \times 10^{-5} \text{ M} \cdot \text{cm}$ , where  $L$  is the sample path length. Since  $L = 7 \pm 1 \mu\text{m}$ , we obtain  $c_e = 44 \pm 6 \text{ mM}$ .

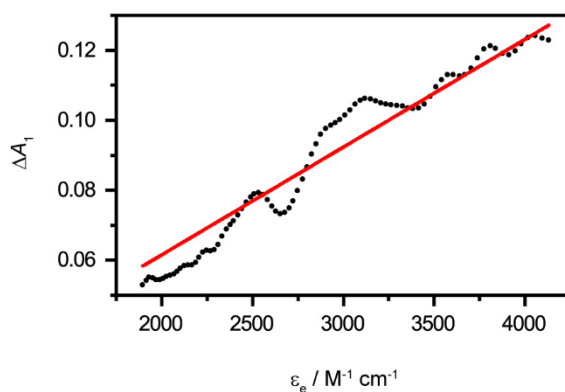

**Fig. S3** Plot of  $\Delta A_1$  as a function of molar extinction coefficient of hydrated electron, and the linear fit function, in red. The gradient of the linear fit function corresponds to the product of the concentration of hydrated electron,  $c_e$  and the sample path length,  $L$ .

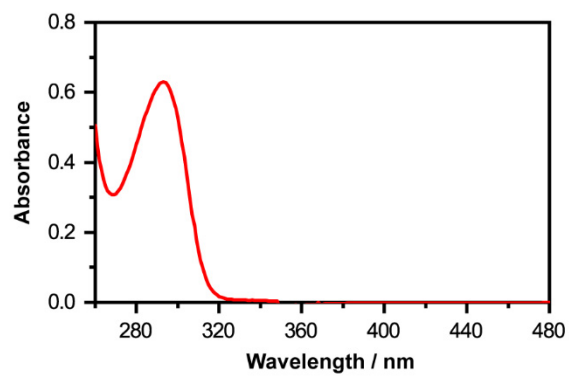

**Fig. S4** Static UV-visible absorption spectrum of 3 mM tyrosinate dianion in aqueous sodium hydroxide solution (pH 14), measured with a 1-mm path length quartz cuvette. The absorption maximum is at 290 nm.

### Section S3. Cartesian Coordinates of Optimized Geometries

#### (a) Isolated tyrosinate dianion, with PCM

| Symbol | X        | Y        | Z        |
|--------|----------|----------|----------|
| C      | 2.599337 | 1.209646 | 0.305402 |
| C      | 1.242395 | 1.241094 | 0.004854 |
| C      | 0.561584 | 0.122887 | -0.50693 |
| C      | 1.327072 | -1.03654 | -0.70349 |
| C      | 2.688369 | -1.08917 | -0.40954 |
| C      | 3.401032 | 0.035416 | 0.115602 |
| H      | 3.08837  | 2.099893 | 0.693507 |
| H      | 0.691421 | 2.165623 | 0.167722 |
| H      | 0.843872 | -1.92354 | -1.10864 |
| H      | 3.243851 | -2.00749 | -0.58362 |
| O      | 4.664436 | 0.000981 | 0.390765 |
| C      | -0.92178 | 0.166489 | -0.80029 |
| H      | -1.17541 | 1.093511 | -1.3269  |
| H      | -1.18859 | -0.66369 | -1.46505 |
| C      | -1.82693 | 0.080548 | 0.464895 |
| H      | -1.59866 | 0.946802 | 1.093746 |
| C      | -3.31047 | 0.202032 | 0.028464 |
| N      | -1.62646 | -1.14188 | 1.25608  |
| H      | -2.17608 | -1.8788  | 0.819401 |
| H      | -0.64918 | -1.42155 | 1.219466 |
| O      | -3.74705 | 1.369068 | -0.16158 |
| O      | -3.94965 | -0.87155 | -0.14119 |

#### (b) Microhydrated tyrosinate dianionin, with PCM

| Symbol | X        | Y        | Z        |
|--------|----------|----------|----------|
| C      | -1.18363 | -1.17986 | 0.026498 |
| C      | 0.188757 | -1.21373 | -0.20042 |
| C      | 0.897782 | -0.07979 | -0.62578 |
| C      | 0.157984 | 1.094995 | -0.81397 |
| C      | -1.21796 | 1.145659 | -0.58966 |
| C      | -1.93519 | 0.006364 | -0.15976 |
| H      | -1.70362 | -2.07619 | 0.350913 |
| H      | 0.723003 | -2.14829 | -0.0481  |
| H      | 0.667363 | 1.992918 | -1.15419 |
| H      | -1.7602  | 2.07217  | -0.74973 |
| O      | -3.24575 | 0.038641 | 0.056501 |
| C      | 2.393732 | -0.12571 | -0.84382 |
| H      | 2.664276 | -1.04286 | -1.37758 |
| H      | 2.699465 | 0.717792 | -1.47302 |
| C      | 3.229368 | -0.07954 | 0.469625 |
| H      | 2.951449 | -0.95156 | 1.069477 |

|   |          |          |          |
|---|----------|----------|----------|
| C | 4.730607 | -0.2268  | 0.102784 |
| N | 3.016656 | 1.131467 | 1.273156 |
| H | 3.589301 | 1.870348 | 0.871222 |
| H | 2.045077 | 1.426117 | 1.217236 |
| O | 5.14826  | -1.40016 | -0.08754 |
| O | 5.399202 | 0.834915 | -0.01612 |
| O | -4.73656 | 2.205891 | -0.49993 |
| H | -4.15954 | 1.416362 | -0.31332 |
| H | -5.44359 | 1.873671 | -1.062   |
| O | -4.74969 | -1.80544 | -1.21333 |
| H | -4.70132 | -2.62088 | -0.70453 |
| H | -4.17263 | -1.16096 | -0.72567 |
| O | -4.09066 | -0.539   | 2.552424 |
| H | -4.12074 | 0.303572 | 3.016469 |
| H | -3.76208 | -0.3208  | 1.641515 |

**(c) Isolated tyrosyl radical anion, with PCM**

| Symbol | X        | Y        | Z        |
|--------|----------|----------|----------|
| C      | 2.560098 | 1.259945 | 0.271345 |
| C      | 1.226778 | 1.271038 | -0.04037 |
| C      | 0.568657 | 0.107561 | -0.52145 |
| C      | 1.323195 | -1.08147 | -0.67351 |
| C      | 2.660864 | -1.12294 | -0.3673  |
| C      | 3.352685 | 0.052652 | 0.12559  |
| H      | 3.063907 | 2.149652 | 0.631757 |
| H      | 0.653506 | 2.185329 | 0.073111 |
| H      | 0.828113 | -1.97014 | -1.05018 |
| H      | 3.239709 | -2.03152 | -0.48844 |
| O      | 4.577978 | 0.027405 | 0.408755 |
| C      | -0.89599 | 0.136851 | -0.81415 |
| H      | -1.15589 | 1.085892 | -1.29221 |
| H      | -1.1671  | -0.67749 | -1.49122 |
| C      | -1.7845  | 0.015776 | 0.480214 |
| H      | -1.50566 | 0.835312 | 1.14698  |
| C      | -3.26303 | 0.240041 | 0.039295 |
| N      | -1.66052 | -1.24672 | 1.199263 |
| H      | -2.17251 | -1.9623  | 0.690292 |
| H      | -0.69402 | -1.54264 | 1.29251  |
| O      | -3.63999 | 1.435914 | -0.04853 |
| O      | -3.93286 | -0.79104 | -0.22341 |



**(d) Microhydrated tyrosyl radical anion, with PCM**

| Symbol | X        | Y        | Z        |
|--------|----------|----------|----------|
| C      | -1.12195 | -1.19601 | -0.12384 |
| C      | 0.22706  | -1.21409 | -0.35121 |
| C      | 0.942702 | -0.02459 | -0.66252 |
| C      | 0.226296 | 1.198326 | -0.72347 |
| C      | -1.12528 | 1.244732 | -0.49788 |
| C      | -1.8627  | 0.042708 | -0.18506 |
| H      | -1.66888 | -2.10321 | 0.104379 |
| H      | 0.769389 | -2.15221 | -0.30363 |
| H      | 0.76329  | 2.108278 | -0.96682 |
| H      | -1.67444 | 2.17715  | -0.55274 |
| O      | -3.11746 | 0.075168 | 0.025779 |
| C      | 2.413712 | -0.06462 | -0.86516 |
| H      | 2.694806 | -0.98936 | -1.37618 |
| H      | 2.750238 | 0.786521 | -1.46131 |
| C      | 3.217458 | -0.04517 | 0.504579 |
| H      | 2.860664 | -0.88627 | 1.102216 |
| C      | 4.713116 | -0.30578 | 0.133714 |
| N      | 3.102356 | 1.175377 | 1.278386 |
| H      | 3.623075 | 1.918404 | 0.821617 |
| H      | 2.141822 | 1.471544 | 1.414074 |
| O      | 5.061951 | -1.50967 | 0.062872 |
| O      | 5.413208 | 0.712373 | -0.0895  |
| O      | -4.69478 | 2.430342 | -0.11709 |
| H      | -4.14983 | 1.620321 | -0.0922  |
| H      | -5.36709 | 2.257794 | -0.78453 |
| O      | -4.92461 | -1.64825 | -1.42967 |
| H      | -5.09288 | -2.44698 | -0.91853 |
| H      | -4.3063  | -1.1304  | -0.88582 |
| O      | -4.28991 | -1.02853 | 2.425212 |
| H      | -4.53471 | -0.25427 | 2.943039 |
| H      | -3.89527 | -0.66952 | 1.611907 |

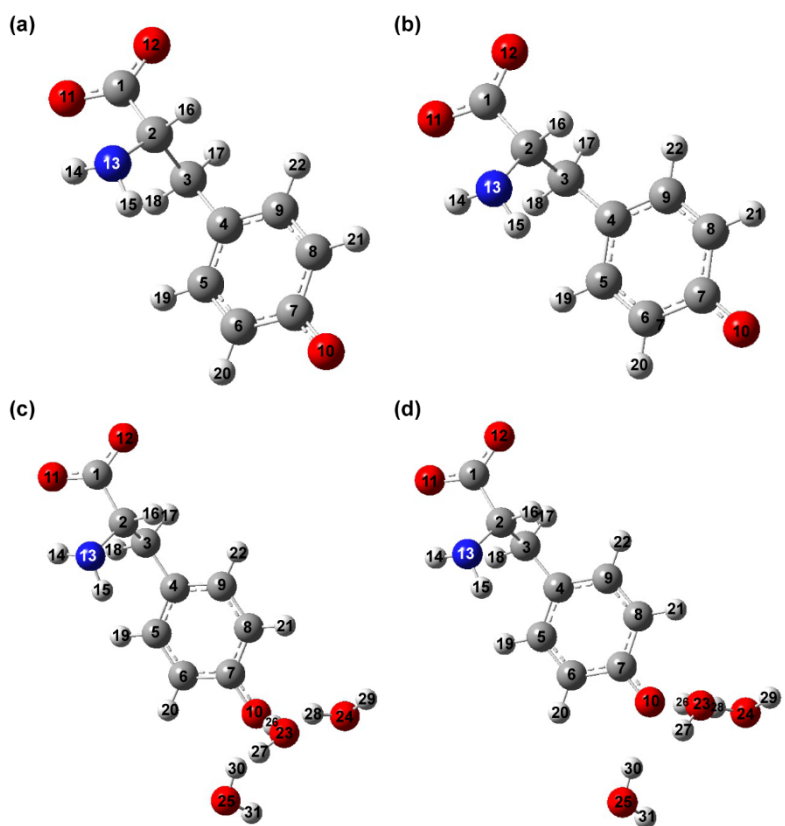

**Fig. S5** Equilibrium molecular geometries of the (a) tyrosinate dianion, (b) tyrosyl radical anion, (c) microhydrated tyrosinate dianion and (d) microhydrated tyrosyl radical anion. The microhydrated species includes three water molecules hydrogen-bonded directly to the phenoxide oxygen atom. The carbon atoms are in gray, the hydrogen atoms are in white, oxygen atoms are in red, and the nitrogen atom is in blue.

**Table S1** Calculated vibrational frequencies of the tyrosyl radical anion and the microhydrated tyrosyl radical in aqueous environment. The assignment of atoms is based on the equilibrium molecular geometries of the tyrosyl radical anion and the microhydrated tyrosyl radical anion, shown in Figs. S5(b) and S5(d), respectively. Numbered assignments denote benzene ring modes in the Wilson notation.<sup>5</sup>

| Calculated Vibrational Frequency (cm <sup>-1</sup> ) |                       |                                     |                                                     |
|------------------------------------------------------|-----------------------|-------------------------------------|-----------------------------------------------------|
|                                                      | Tyrosyl Radical Anion | Microhydrated Tyrosyl Radical Anion | Assignment                                          |
| 1                                                    | 38                    | 42                                  | Benzyl Ring Torsion / COO <sup>-</sup> Twist        |
| 2                                                    | 52                    | 53                                  | Chain Torsion                                       |
| 3                                                    | 59                    | 61                                  | Benzyl Ring Torsion                                 |
| 4                                                    | 80                    | 77                                  | COO <sup>-</sup> Twist / Chain CH <sub>2</sub> Rock |
| 5                                                    | 157                   | 176                                 | 11                                                  |
| 6                                                    | 176                   | 186                                 | Chain Bend                                          |
| 7                                                    | 241                   | 252                                 | NH <sub>2</sub> Rock                                |
| 8                                                    | 294                   | 295                                 | 10b                                                 |
| 9                                                    | 322                   | 337                                 | 15                                                  |
| 10                                                   | 351                   | 356                                 | Chain CH <sub>2</sub> Rock / NH <sub>2</sub> Twist  |
| 11                                                   | 383                   | 386                                 | 16a                                                 |
| 12                                                   | 389                   | 388                                 | Chain Bend                                          |
| 13                                                   | 458                   | 469                                 | 3                                                   |
| 14                                                   | 483                   | 482                                 | 6a                                                  |
| 15                                                   | 519                   | 522                                 | 16b                                                 |
| 16                                                   | 556                   | 558                                 | 16b                                                 |
| 17                                                   | 622                   | 622                                 | 6b                                                  |
| 18                                                   | 679                   | 676                                 | 4                                                   |
| 19                                                   | 715                   | 715                                 | 4                                                   |
| 20                                                   | 763                   | 768                                 | 4                                                   |
| 21                                                   | 792                   | 795                                 | 10a                                                 |

|    |      |      |                                                                    |
|----|------|------|--------------------------------------------------------------------|
| 22 | 805  | 816  | 12                                                                 |
| 23 | 825  | 832  | 1                                                                  |
| 24 | 841  | 789  | 17b                                                                |
| 25 | 862  | 850  | NH <sub>2</sub> Wag                                                |
| 26 | 884  | 886  | 17b                                                                |
| 27 | 893  | 876  | Benzene Out-of-plane CH Bend                                       |
| 28 | 968  | 938  | Chain CH <sub>2</sub> Rock                                         |
| 29 | 988  | 992  | 5                                                                  |
| 30 | 990  | 994  | 19a                                                                |
| 31 | 996  | 1000 | 17a                                                                |
| 32 | 1076 | 1074 | 19b                                                                |
| 33 | 1123 | 1127 | 14                                                                 |
| 34 | 1158 | 1155 | Chain CH <sub>2</sub> Twist / NH <sub>2</sub> Wag                  |
| 35 | 1175 | 1185 | 8a                                                                 |
| 36 | 1219 | 1221 | Chain CH <sub>2</sub> Twist / Chain CH Wag                         |
| 37 | 1231 | 1240 | 13                                                                 |
| 38 | 1271 | 1264 | Chain CH <sub>2</sub> Wag / Chain CH Wag                           |
| 39 | 1275 | 1293 | 9b                                                                 |
| 40 | 1316 | 1304 | Chain CH Wag / Chain CH <sub>2</sub> Wag                           |
| 41 | 1343 | 1350 | Chain CH <sub>2</sub> Wag                                          |
| 42 | 1355 | 1340 | COO <sup>-</sup> Bend / Chain CH Wag / Chain CH <sub>2</sub> Twist |
| 43 | 1401 | 1400 | Chain CH Wag / NH <sub>2</sub> Twist                               |
| 44 | 1429 | 1420 | 20a                                                                |
| 45 | 1452 | 1462 | 18b                                                                |
| 46 | 1483 | 1485 | Chain CH <sub>2</sub> Bend                                         |
| 47 | 1506 | 1508 | 18b                                                                |
| 48 | 1515 | 1520 | 20a                                                                |
| 49 | 1580 | 1586 | NH <sub>2</sub> Bend / COO <sup>-</sup> Asymmetric Stretch         |
| 50 | 1605 | 1626 | 9a                                                                 |
| 51 | 1620 | 1622 | NH <sub>2</sub> Bend                                               |

|    |      |      |                                          |
|----|------|------|------------------------------------------|
| 52 | 3035 | 3042 | Chain CH <sub>2</sub> Symmetric Stretch  |
| 53 | 3054 | 3067 | Chain CH Stretch                         |
| 54 | 3089 | 3089 | Chain CH <sub>2</sub> Asymmetric Stretch |
| 55 | 3166 | 3173 | 7b                                       |
| 56 | 3169 | 3177 | 7b                                       |
| 57 | 3188 | 3195 | 20b                                      |
| 58 | 3190 | 3197 | 2                                        |
| 59 | 3485 | 3494 | NH <sub>2</sub> Symmetric Stretch        |
| 60 | 3569 | 3582 | NH <sub>2</sub> Asymmetric Stretch       |

**Table S2** Calculated low-frequency vibrational modes of the microhydrated tyrosyl radical anion.

| <b>Microhydrated Tyrosyl Radical<br/>Anion Low Frequency / cm<sup>-1</sup></b> |     | <b>Assignment</b>      |
|--------------------------------------------------------------------------------|-----|------------------------|
| 1                                                                              | 16  | Intermolecular bending |
| 2                                                                              | 22  | Intermolecular bending |
| 3                                                                              | 26  | Intermolecular bending |
| 4                                                                              | 31  | Intermolecular bending |
| 5                                                                              | 34  | Intermolecular bending |
| 6                                                                              | 38  | Intermolecular bending |
| 7                                                                              | 62  | Intermolecular bending |
| 8                                                                              | 70  | Intermolecular bending |
| 9                                                                              | 74  | Intermolecular bending |
| 10                                                                             | 130 | Translation            |
| 11                                                                             | 134 | Translation            |
| 12                                                                             | 158 | Translation            |

## References

1. A. Roy, R. Seidel, G. Kumar and S. E. Bradforth, *J. Phys. Chem. B*, 2018, **122**, 3723-3733.
2. D. Ghosh, A. Roy, R. Seidel, B. Winter, S. Bradforth and A. I. Krylov, *J. Phys. Chem. B*, 2012, **116**, 7269-7280.
3. B. Winter, M. Faubel, R. Vácha and P. Jungwirth, *Chem. Phys. Lett.*, 2009, **474**, 241-247.
4. G. Czapski and B. H. J. Bielski, *Radiat. Phys. Chem.*, 1993, **41**, 503-505.
5. E. B. Wilson, *Physical Review*, 1934, **45**, 706-714.
